# Supplementary material
Source: PubMed Central journal article supplement (PMC4221586)

## Supplementary Figure S1

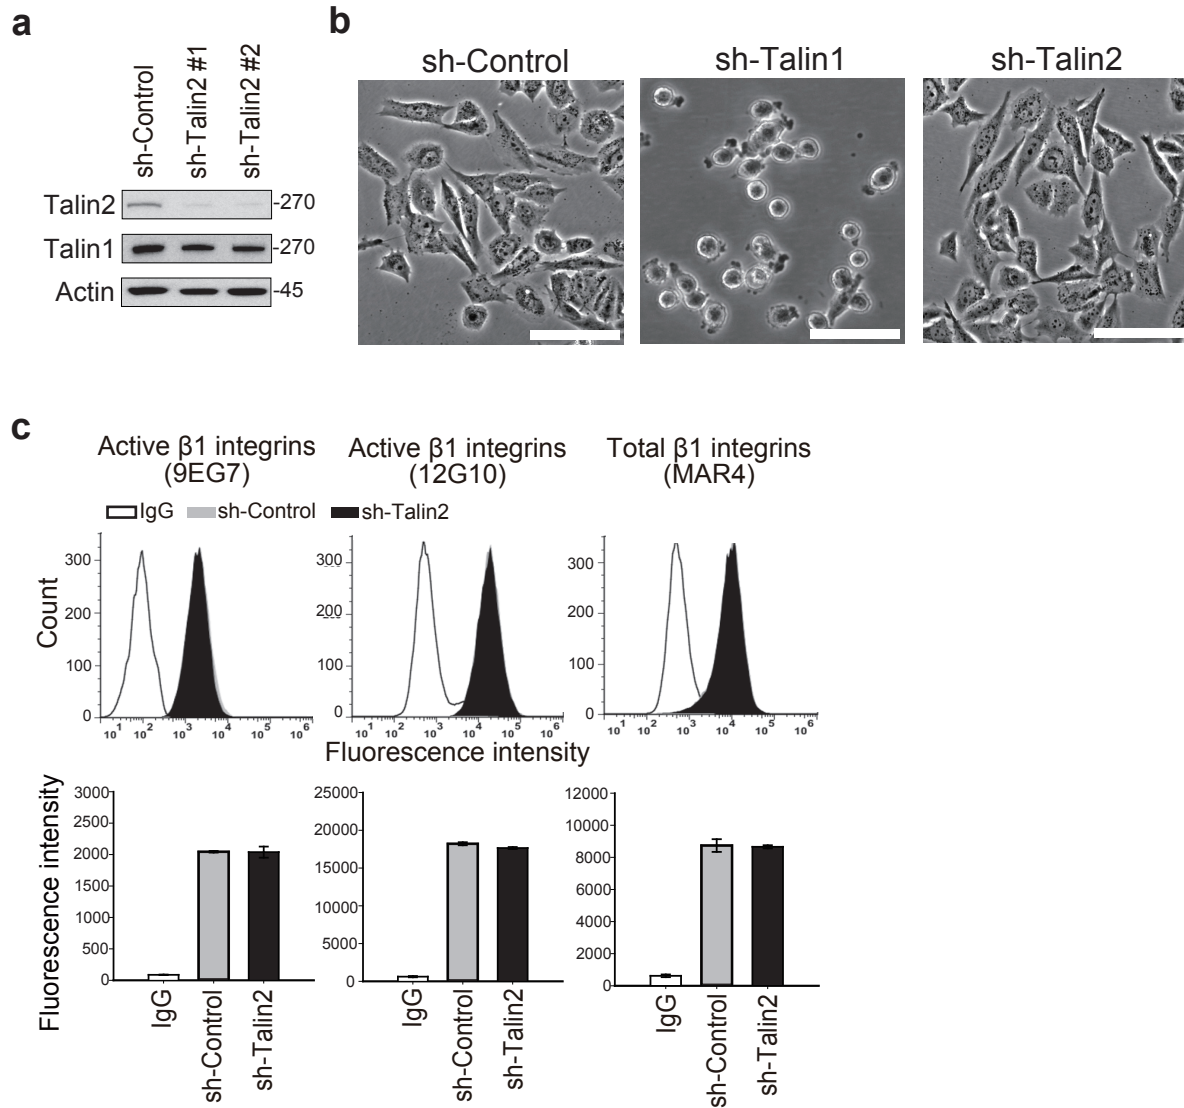

Supplement: NIHMS579970-supplement-1.pdf [file NIHMS579970-supplement-1.pdf]

# Supplementary Figure S2

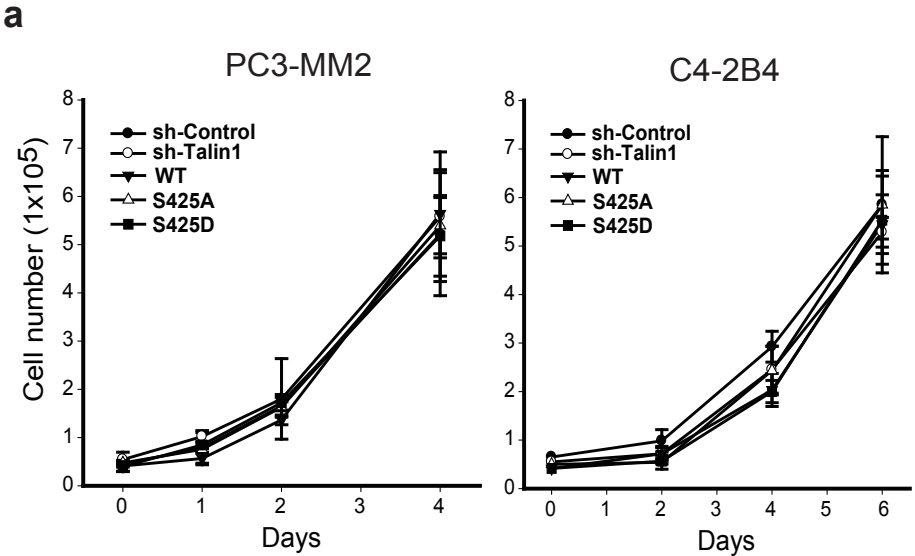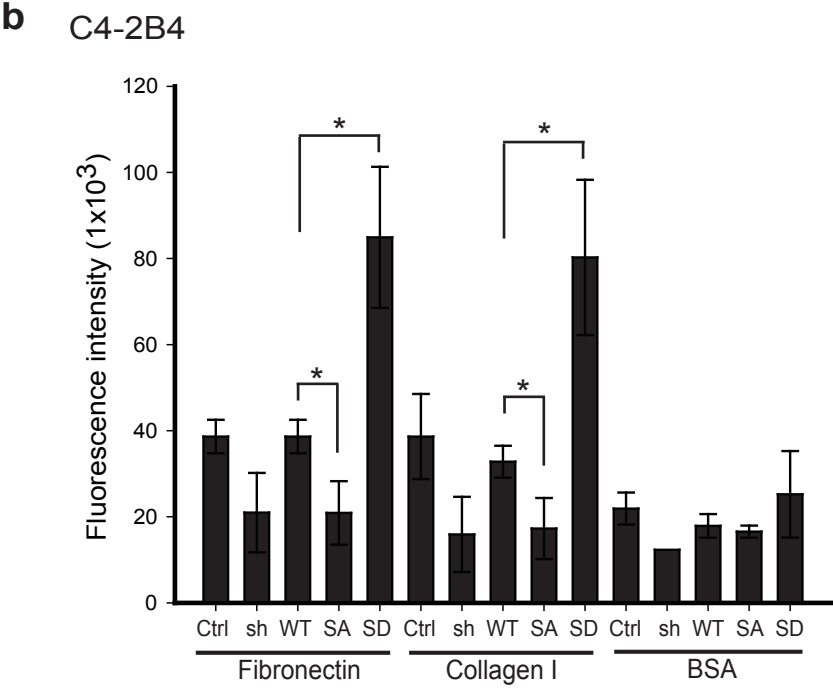

Supplement: NIHMS579970-supplement-2.pdf [file NIHMS579970-supplement-2.pdf]

## Supplementary Figure S3

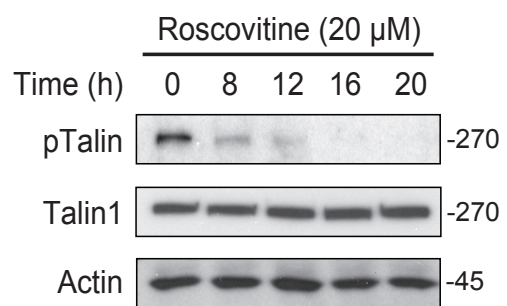

Supplement: NIHMS579970-supplement-3.pdf [file NIHMS579970-supplement-3.pdf]

## Supplementary Figure S4

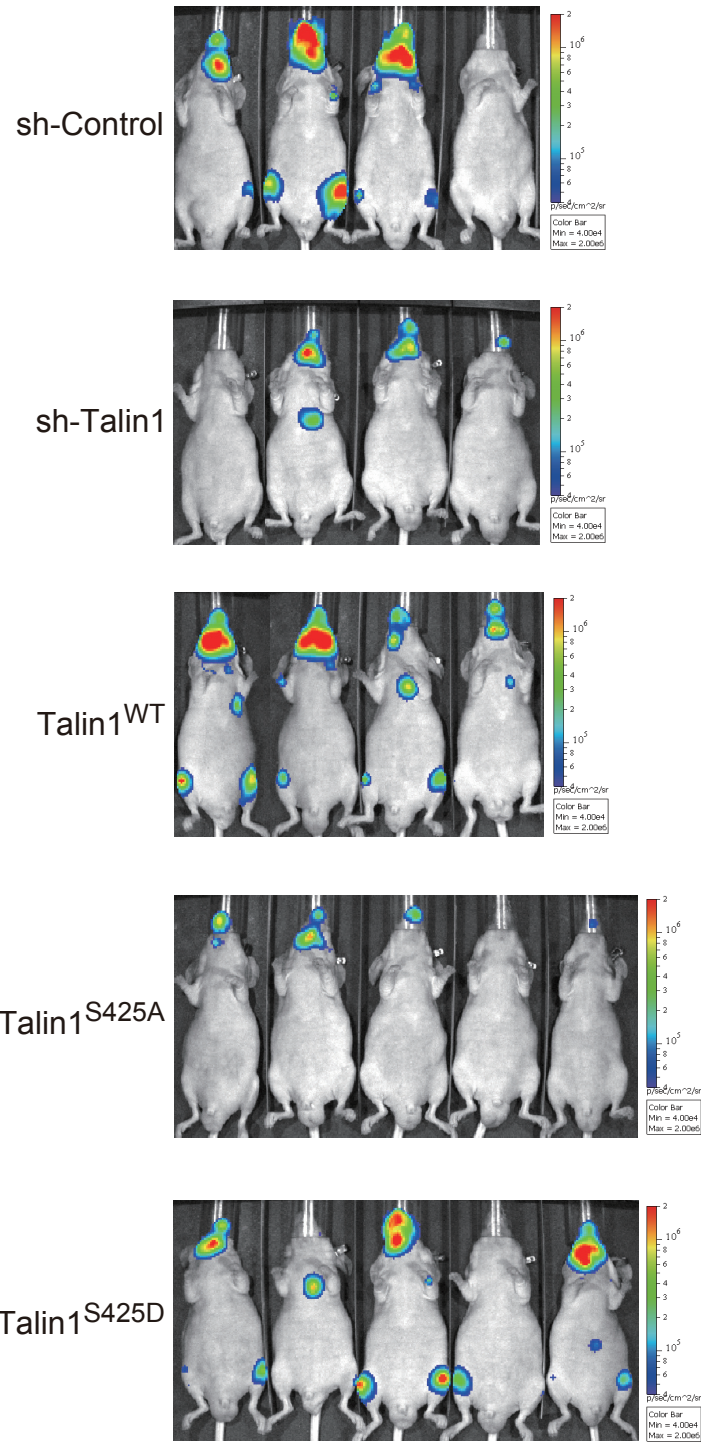

Supplement: NIHMS579970-supplement-4.pdf [file NIHMS579970-supplement-4.pdf]

## Supplementary Figure S5

pTalin S425 antibody

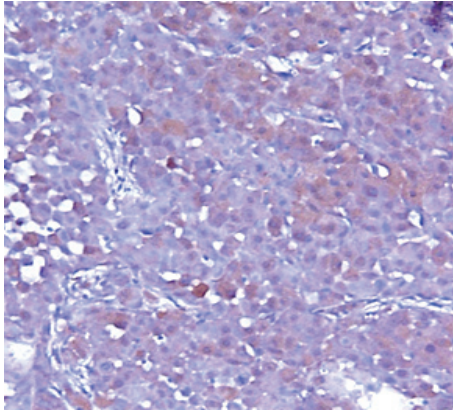

pTalin S425 antibody with  
blocking peptide

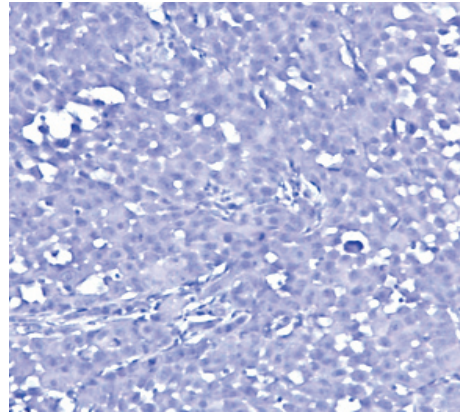

Supplement: NIHMS579970-supplement-5.pdf [file NIHMS579970-supplement-5.pdf]
